# Supplementary material for: Micron-sized encapsulated-type MoS2/C hybrid particulates with an effective confinement effect for improving the cycling performance of LIB anodes
Source: Royal Society of Chemistry journal article supplement (doi:10.1039/c8ta00674a), 2018-01-01
Supplement: c8ta00674a1.pdf [file c8ta00674a1.pdf]

## Supporting Information

Micron-sized encapsulated-type MoS<sub>2</sub>/C hybrid particulates  
with effective confinement effect for improving cycling  
performance of LIB anodes

Boya Sun, Qinglei Liu\*, Wenshu Chen, Ning Wang, Jiajun Gu, Wang Zhang, Huilan Su, and Di  
Zhang\*

State Key Laboratory of Metal Matrix Composites, Shanghai Jiao Tong University, 800

Dongchuan Road, Shanghai 200240, P. R. China

\* liuqinglei@sjtu.edu.cn; [zhangdi@sjtu.edu.cn](mailto:zhangdi@sjtu.edu.cn)

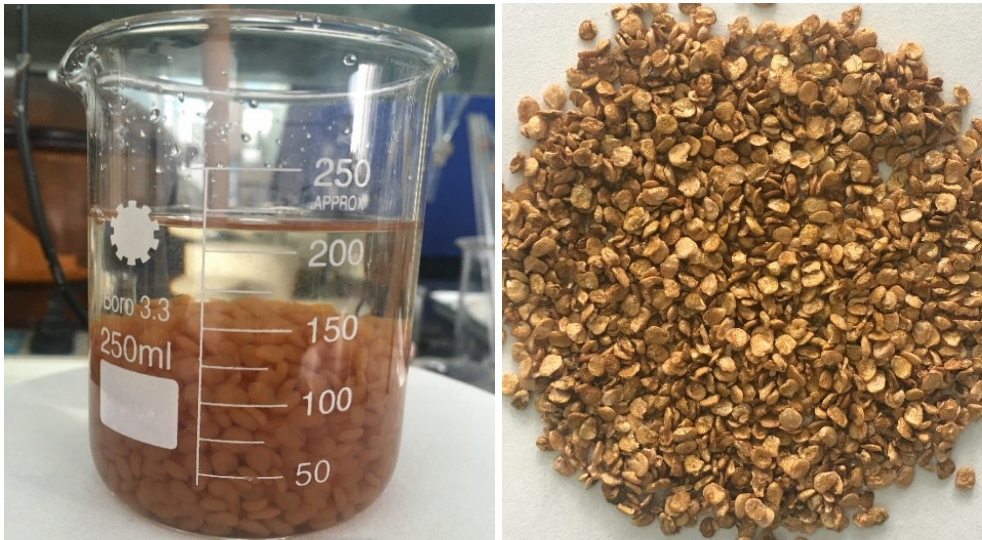

**Figure S1.** Digital photographs of cross-linked Mo/SA gels and freeze-dried globules.

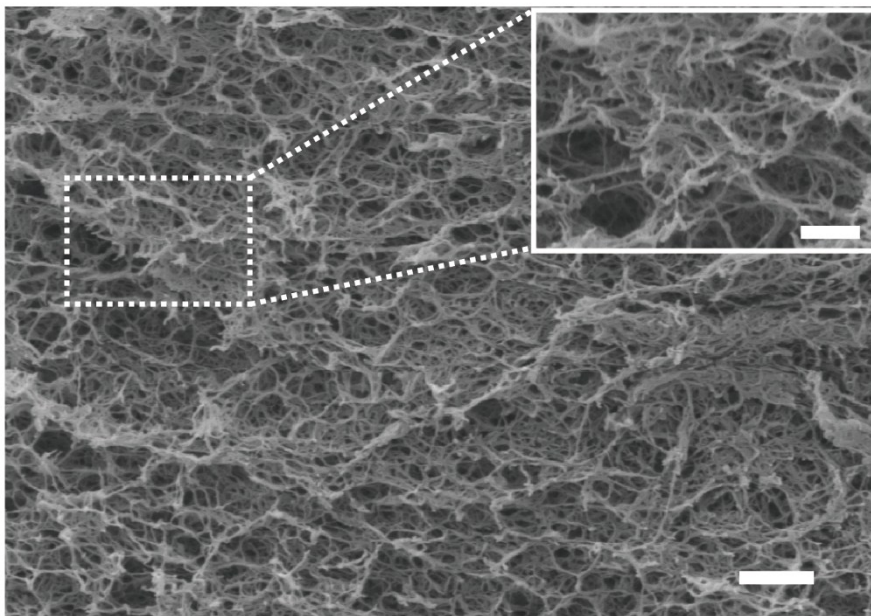

**Figure S2.** SEM image of Mo/SA gel globules after freeze-drying. Scar bar is 1  $\mu\text{m}$  (500 nm for inset image).

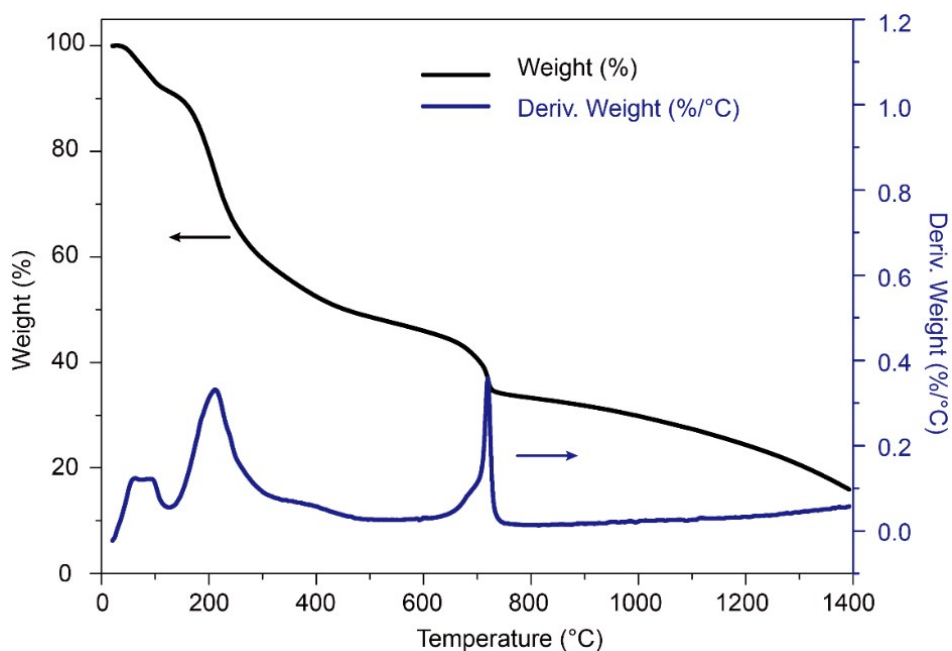

**Figure S3.** TG curve of Mo/SA gels acquired under a heating rate of  $10\text{ }^{\circ}\text{C min}^{-1}$  in Ar atmosphere.

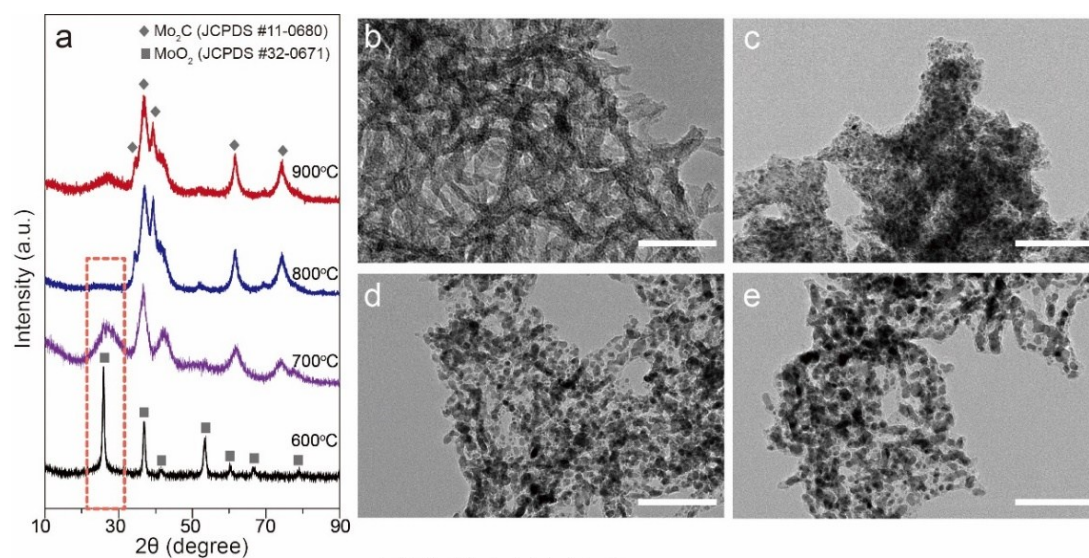

**Figure S4.** (a) XRD profiles and (b-e) TEM images of the as-synthesized nanocomposites carbonized at  $600\text{ }^{\circ}\text{C}$  (b),  $700\text{ }^{\circ}\text{C}$  (c),  $800\text{ }^{\circ}\text{C}$  (d), and  $900\text{ }^{\circ}\text{C}$  (e), respectively, before sulfurization. The sizes of particles in carbonized samples are 3, 5, 10, and 15 nm, respectively. Scale bars are 100 nm.

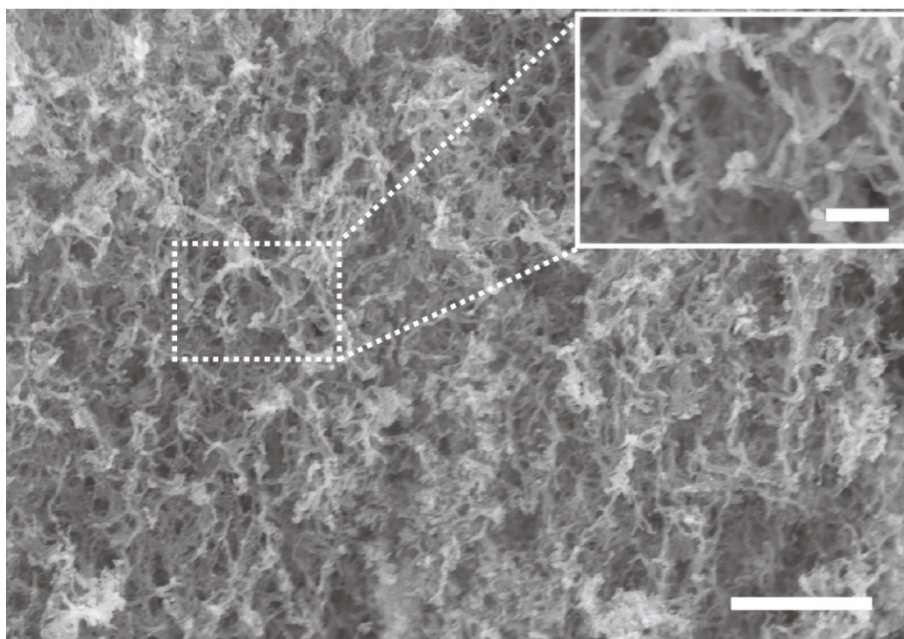

**Figure S5.** SEM image of Mo<sub>2</sub>C/C hybrids after carbonization at 900 °C. Scar bar is 1 μm (200 nm for inset image).

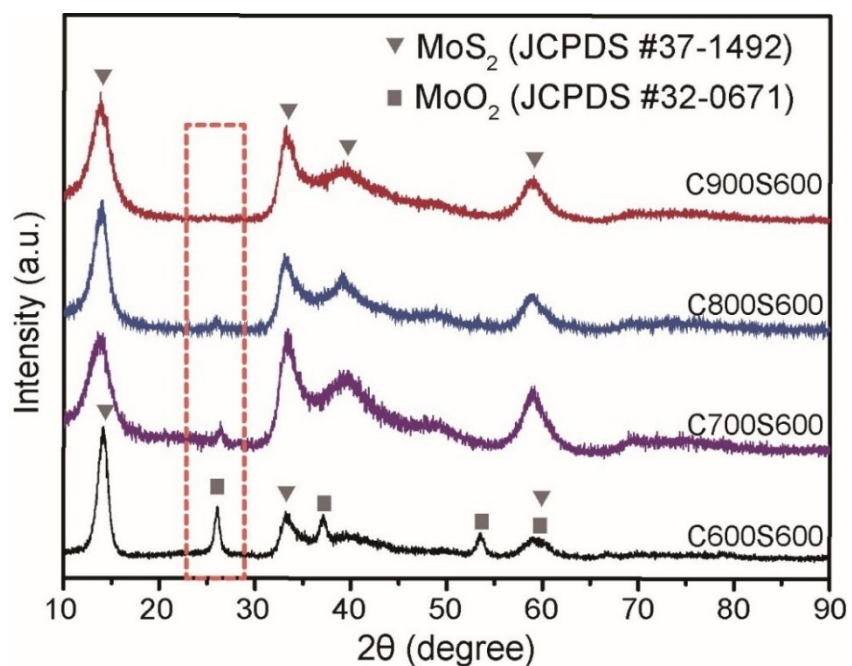

**Figure S6.** XRD profiles of samples obtained after rapid sulfurization at 600 °C and they are labeled as C600S600, C700S600, C800S600 and C900S600, respectively. For the sulfurized samples, the diffraction peaks of MoO<sub>2</sub> gradually disappear with the increase of initial carbonization temperature. Pure hexagonal MoS<sub>2</sub> phase is obtained in the C900S600 sample (MoS<sub>2</sub>/C).

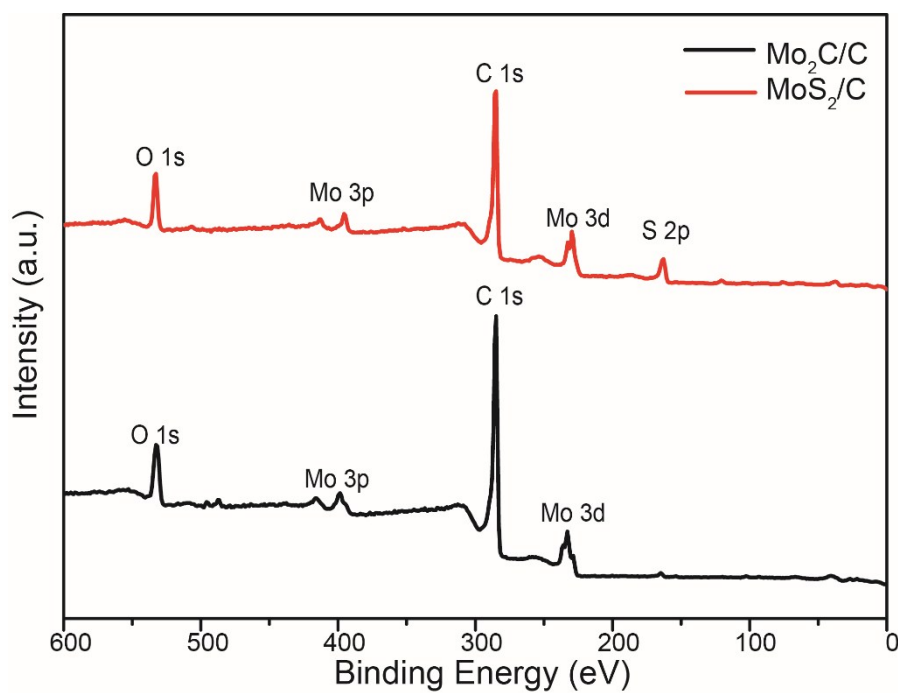

**Figure S7.** XPS spectra of Mo<sub>2</sub>C/C and MoS<sub>2</sub>/C hybrids.

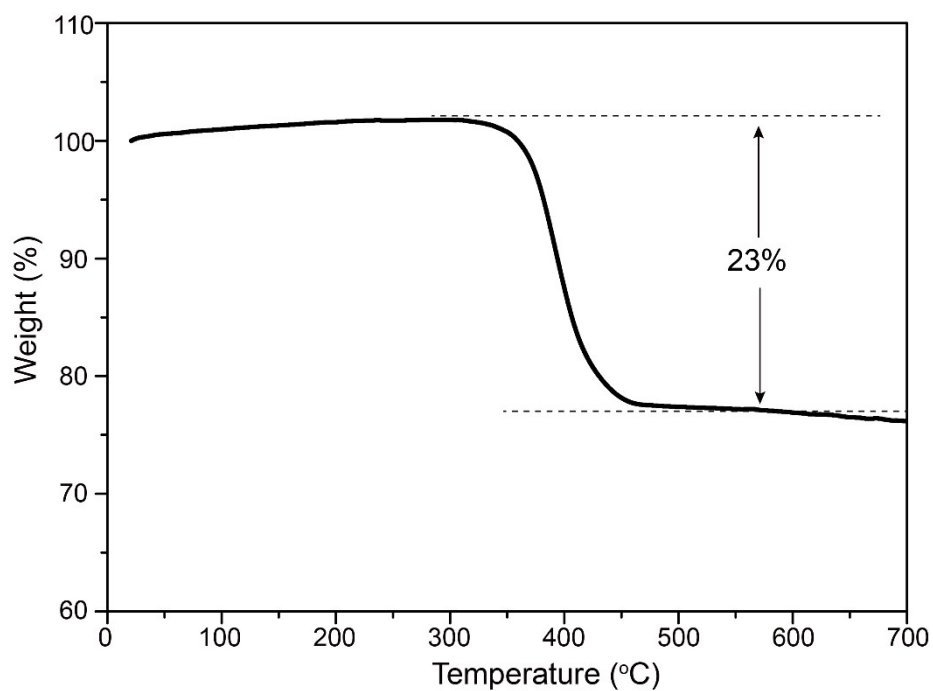

**Figure S8.** TG curve of MoS<sub>2</sub>/C hybrids recorded with a temperature ramp of 10 °C min<sup>-1</sup> under air atmosphere. The weight loss at about 400 °C comes from the oxidation of MoS<sub>2</sub> to MoO<sub>3</sub>. The weight content of MoS<sub>2</sub> in composite is calculated to be 85.6 %.

**Table S1.** Details of the porous structure characteristics of Mo<sub>2</sub>C/C and MoS<sub>2</sub>/C hybrids.

|                     | $S_{\text{BET}}$                  | $S_{\text{mi}}$                   | $S_{\text{me}}$                   | $V_{\text{t}}$                     | $V_{\text{mi}}$                    | $V_{\text{me}}$                    |
|---------------------|-----------------------------------|-----------------------------------|-----------------------------------|------------------------------------|------------------------------------|------------------------------------|
|                     | (m <sup>2</sup> g <sup>-1</sup> ) | (m <sup>2</sup> g <sup>-1</sup> ) | (m <sup>2</sup> g <sup>-1</sup> ) | (cm <sup>3</sup> g <sup>-1</sup> ) | (cm <sup>3</sup> g <sup>-1</sup> ) | (cm <sup>3</sup> g <sup>-1</sup> ) |
| Mo <sub>2</sub> C/C | 361.73                            | 192.16                            | 169.57                            | 0.31                               | 0.09                               | 0.22                               |
| MoS <sub>2</sub> /C | 430.72                            | 266.96                            | 163.76                            | 0.38                               | 0.12                               | 0.26                               |

$S_{\text{mi}}$ , specific surface area of the micropores;  $S_{\text{me}}$ , specific surface area of the mesopores;  $V_{\text{t}}$ , total pore volume;  $V_{\text{mi}}$ , pore volume of micropores;  $V_{\text{me}}$ , pore volume of mesopores.

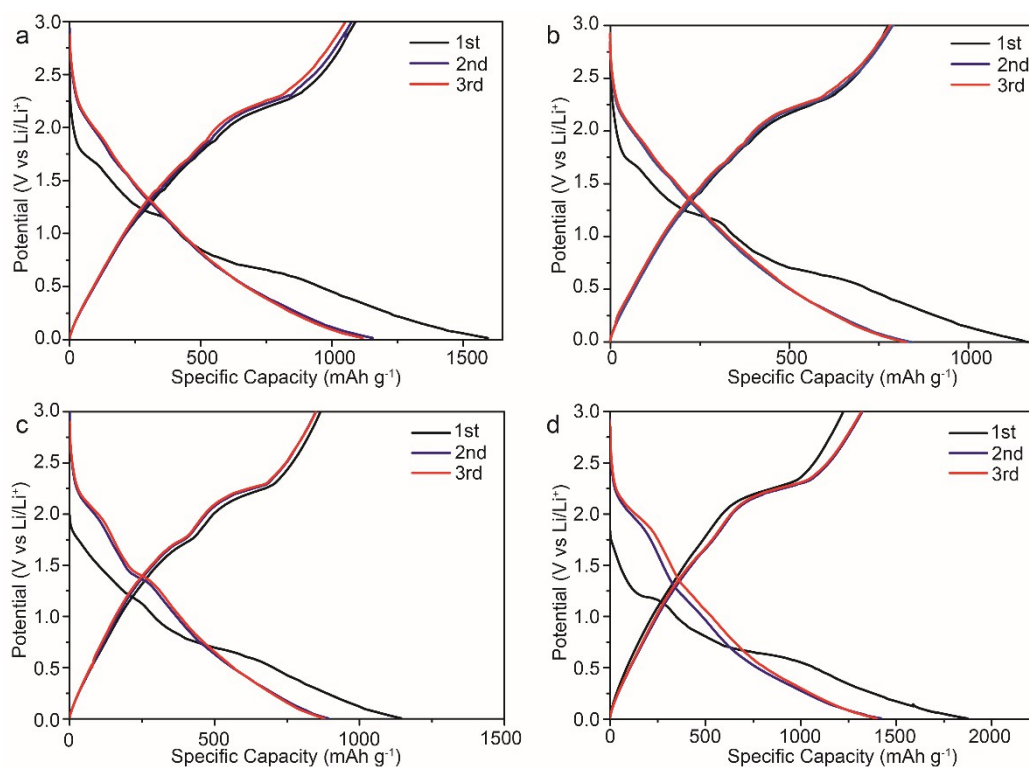

**Figure S9.** Galvanostatic charge/discharge profiles of (a) C600S600, (b) C700S600, (c) C800S600, and (d) C900S600 (i.e. MoS<sub>2</sub>/C) samples during initial three cycles.

**Table S2.** Summary of LIB properties for MoS<sub>2</sub> based electrodes.

| Material                                     | Synthesis method              | First discharge capacity (mAh g <sup>-1</sup> ) | First charge capacity (mAh g <sup>-1</sup> ) | Capacity after (n) cycles (mAh g <sup>-1</sup> ) | Coulombic efficiency %     | Current density (mAh g <sup>-1</sup> ) | Rate capability (mAh g <sup>-1</sup> ) at (X) current density | Ref.             |
|----------------------------------------------|-------------------------------|-------------------------------------------------|----------------------------------------------|--------------------------------------------------|----------------------------|----------------------------------------|---------------------------------------------------------------|------------------|
| <b>MoS<sub>2</sub>/C</b>                     | <b>Thermal reaction</b>       | <b>1873</b>                                     | <b>1222</b>                                  | <b>1300 (100)</b><br><b>1250 (480)</b>           | <b>97.2</b><br><b>98.5</b> | <b>100</b><br><b>1000</b>              | <b>929 (1000 mA g<sup>-1</sup>)</b>                           | <b>this work</b> |
| MoS <sub>2</sub> -amC                        | Solvothermal                  | 1062                                            | 917                                          | 907 (50)                                         | 98*                        | 1062                                   | 700 (53.1 A g <sup>-1</sup> )                                 | 1                |
| MoS <sub>2</sub> -graphene                   | Hydrothermal                  | 1571                                            | 1031                                         | 1187 (100)                                       | —                          | 100                                    | ~900 (1000 mA g <sup>-1</sup> )                               | 2                |
| MoS <sub>2</sub> -rGO                        | Exfoliation                   | 1240                                            | —                                            | 890 (100)                                        | —                          | 100                                    | 600 (1000 mA g <sup>-1</sup> )                                | 3                |
| MoS <sub>2</sub> -rGO                        | Hydrothermal                  | 1367                                            | 912                                          | 808 (100)                                        | —                          | 100                                    | 571 (1000 mA g <sup>-1</sup> )                                | 4                |
| MoS <sub>2</sub> -rGO                        | Hydrothermal                  | 1426                                            | 934                                          | 1020 (100)                                       | —                          | 100                                    | 760 (1000 mA g <sup>-1</sup> )                                | 5                |
| MoS <sub>2</sub> -3D graphene                | CVD and thermal decomposition | 1222                                            | 1020                                         | 877 (50)                                         | —                          | 100                                    | 597 (1000 mA g <sup>-1</sup> )                                | 6                |
| MoS <sub>2</sub> -rGO                        | Exfoliation                   | 971                                             | 658                                          | 915 (700)                                        | >97                        | 500                                    | 339 (20 A g <sup>-1</sup> )                                   | 7                |
| MoS <sub>2</sub> -rGO                        | Hydrothermal                  | 1653                                            | 1176                                         | 1183 (100)                                       | ~100                       | 100                                    | 901 (1000 mA g <sup>-1</sup> )                                | 8                |
| MoS <sub>2</sub> -rGO                        | Hydrothermal                  | 1592                                            | 1036                                         | 1063 (100)                                       | 100                        | 100                                    | 732-718 (1000 mA g <sup>-1</sup> )                            | 9                |
| MoS <sub>2</sub> -rGO                        | Exfoliation                   | 1560                                            | 1220                                         | 1216 (30)                                        | —                          | 74                                     | 711 (1860 mA g <sup>-1</sup> )                                | 10               |
| MoS <sub>2</sub> -graphene                   | Hydrothermal                  | 936                                             | 820                                          | 1100 (50)                                        | >99                        | 1000                                   | 820 (10 A g <sup>-1</sup> )                                   | 11               |
| MoS <sub>2</sub> -graphene                   | Exfoliation                   | 1780                                            | 1399                                         | 1351 (200)                                       | —                          | 100                                    | 591 (1000 mA g <sup>-1</sup> )                                | 12               |
| MoS <sub>2</sub> -C sheets                   | Thermal reaction              | 1654                                            | 1161                                         | ~1127 (200)                                      | ~100                       | 100                                    | 250 (10 A g <sup>-1</sup> )                                   | 13               |
| MoS <sub>2</sub> -SiO <sub>2</sub> -graphene | Hydrothermal                  | 1266                                            | 1019                                         | 1060 (100)                                       | —                          | 100                                    | 580 (8 A g <sup>-1</sup> )                                    | 14               |
| MoS <sub>2</sub> @GF/CNT                     | Hydrothermal                  | 1568                                            | 1252                                         | 1112 (120)                                       | 81.3                       | 200                                    | 823 (5 A g <sup>-1</sup> )                                    | 15               |
| MoS <sub>2</sub> -graphene                   | Hydrothermal                  | 1521                                            | 1110                                         | 1150 (60)                                        | —                          | 100                                    | 890 (1000 mA g <sup>-1</sup> )                                | 16               |
| MoS <sub>2</sub> -CNT                        | Microwave                     | 1280                                            | 790                                          | 927* (80)                                        | 96*                        | 500                                    | 670 (1600 mA g <sup>-1</sup> )                                | 17               |
| MoS <sub>2</sub> -3D graphene                | Hydrothermal                  | 1405.9                                          | 1022.3                                       | 997 (700)                                        | ~100                       | 2000                                   | 688 (8 A g <sup>-1</sup> )                                    | 18               |

| Material                   | Synthesis method | First discharge capacity (mAh g <sup>-1</sup> ) | First charge capacity (mAh g <sup>-1</sup> ) | Capacity after (n) cycles (mAh g <sup>-1</sup> ) | Coulombic efficiency % | Current density (mAh g <sup>-1</sup> ) | Rate capability (mAh g <sup>-1</sup> ) at (X) current density | Ref. |
|----------------------------|------------------|-------------------------------------------------|----------------------------------------------|--------------------------------------------------|------------------------|----------------------------------------|---------------------------------------------------------------|------|
| MoS <sub>2</sub> -PPY-rGO  | Wet reaction     | 1428                                            | 1085                                         | 1070 (400)                                       | ~100                   | 200                                    | ~600 (2 A g <sup>-1</sup> )                                   | 19   |
| MoS <sub>2</sub> -graphene | Thermal reaction | 1000                                            | 750                                          | ~1040 (120)                                      | >97                    | 100                                    | 460 (5 A g <sup>-1</sup> )                                    | 20   |
| MoS <sub>2</sub> /graphene | Hydrothermal     | 1160                                            | 896                                          | 1077 (150)                                       | —                      | 100                                    | 890 (1000 mA g <sup>-1</sup> )                                | 21   |

\*-indicates a value estimated from a published graph.



**Table S3.** Values of  $R_s$ ,  $R_f$ , and  $R_{ct}$  of MoS<sub>2</sub>/C electrodes obtained by fitting data according to the equivalent circuit model presented in Figure 7b.

|                               | $R_s$ ( $\Omega$ ) | $R_f$ ( $\Omega$ ) | $R_{ct}$ ( $\Omega$ ) |
|-------------------------------|--------------------|--------------------|-----------------------|
| <b>Initial</b>                | 47.92              | —                  | 210.6                 |
| <b>100<sup>th</sup> cycle</b> | 43.6               | 37.07              | 95.81                 |

## References

1. H. Hwang, H. Kim and J. Cho, *Nano Lett.*, 2011, **11**, 4826-4830.
2. K. Chang and W. Chen, *ACS Nano*, 2011, **5**, 4720-4728.
3. Y. T. Liu, X. D. Zhu, Z. Q. Duan and X. M. Xie, *Chem. Commun.*, 2013, **49**, 10305-10307.
4. Z. Wang, T. Chen, W. Chen, K. Chang, L. Ma, G. Huang, D. Chen and J. Y. Lee, *J. Mater. Chem. A*, 2013, **1**, 2202-2210.
5. G. Huang, T. Chen, W. Chen, Z. Wang, K. Chang, L. Ma, F. Huang, D. Chen and J. Y. Lee, *Small*, 2013, **9**, 3693-3703.
6. X. Cao, Y. Shi, W. Shi, X. Rui, Q. Yan, J. Kong and H. Zhang, *Small*, 2013, **9**, 3433-3438.
7. X. Zhou, L. J. Wan and Y. G. Guo, *Chem. Commun.*, 2013, **49**, 1838-1840.
8. L. Ma, G. Huang, W. Chen, Z. Wang, J. Ye, H. Li, D. Chen and J. Y. Lee, *J. Power Sources*, 2014, **264**, 262-271.
9. X. Zhou, Z. Wang, W. Chen, L. Ma, D. Chen and J. Y. Lee, *J. Power Sources*, 2014, **251**, 264-268.
10. Y. Gong, S. Yang, L. Zhan, L. Ma, R. Vajtai and P. M. Ajayan, *Adv. Funct. Mater.*, 2014, **24**, 125-130.
11. W. Fu, F. H. Du, J. Su, X. H. Li, X. Wei, T. N. Ye, K. X. Wang and J. S. Chen, *Sci. Rep.*, 2014, **4**, 4673.
12. Y. Liu, Y. Zhao, L. Jiao and J. Chen, *J. Mater. Chem. A*, 2014, **2**, 13109-13115.
13. J. Zhou, J. Qin, X. Zhang, C. Shi, E. Liu, J. Li, N. Zhao and C. He, *ACS Nano*, 2015, **9**, 3837-3848.
14. S. Han, Y. Zhao, Y. Tang, F. Tan, Y. Huang, X. Feng and D. Wu, *Carbon*, 2015, **81**, 203-209.
15. J. Wang, J. Liu, J. Luo, P. Liang, D. Chao, L. Lai, J. Lin and Z. Shen, *J. Mater. Chem. A*, 2015, **3**, 17534-17543.
16. H. Li, K. Yu, H. Fu, B. Guo, X. Lei and Z. Zhu, *J. Phys. Chem. C*, 2015, **119**, 7959-7968.
17. H. Yoo, A. P. Tiwari, J. Lee, D. Kim, J. H. Park and H. Lee, *Nanoscale*, 2015, **7**, 3404-3409.
18. F. Zhang, Y. Tang, H. Liu, H. Ji, C. Jiang, J. Zhang, X. Zhang and C. S. Lee, *ACS Appl. Mater. Interfaces*, 2016, **8**, 4691-4699.
19. D. Xie, D. H. Wang, W. J. Tang, X. H. Xia, Y. J. Zhang, X. L. Wang, C. D. Gu and J. P. Tu, *J. Power Sources*, 2016, **307**, 510-518.

20. C. Zhao, X. Wang, J. Kong, J. M. Ang, P. S. Lee, Z. Liu and X. Lu, *ACS Appl. Mater. Interfaces*, 2016, **8**, 2372-2379.
21. Y. Teng, H. Zhao, Z. Zhang, Z. Li, Q. Xia, Y. Zhang, L. Zhao, X. Du, Z. Du, P. Lv and K. Swierczek, *ACS Nano*, 2016, **10**, 8526-8535.
